# Supplementary material for: The Lrp/AsnC-Type Regulator PA2577 Controls the EamA-like Transporter Gene PA2576 in Pseudomonas aeruginosa
Source: MDPI journal article supplement (doi:10.3390/ijms222413340), 2021-12-12
Supplement: s1 [file s1]

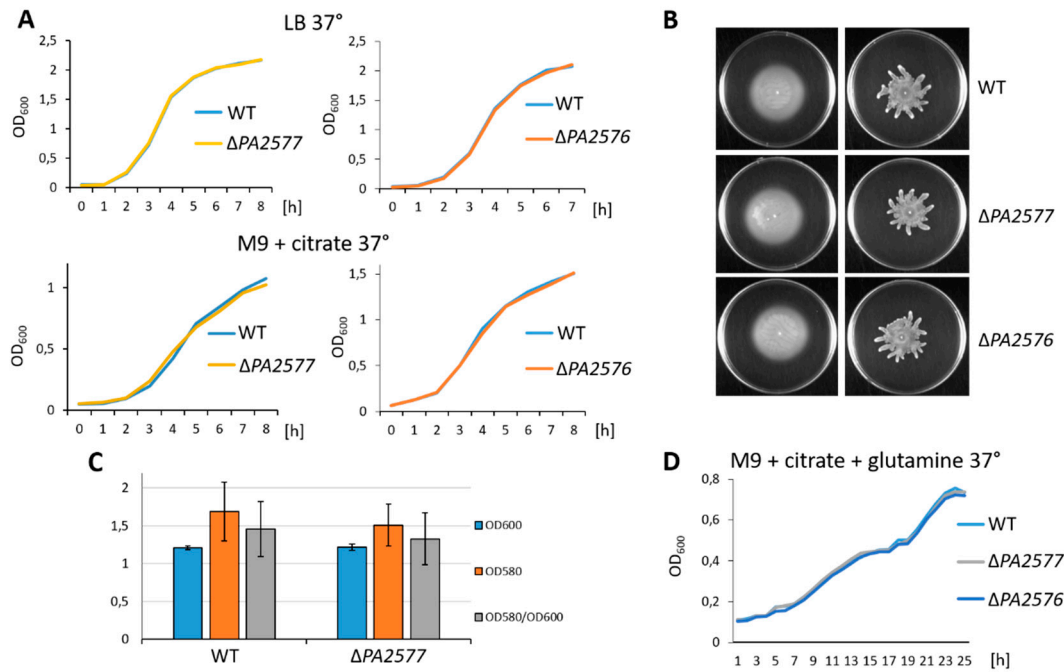

**Figure S1. Phenotypic analysis of *P. aeruginosa* PAO1161 WT,  $\Delta PA2577$  and  $\Delta PA2576$  strains.** Selected charts presenting growth curves, swimming and swarming assays and biofilm formation ability tests of *P. aeruginosa* PAO1161 WT,  $\Delta PA2577$  and  $\Delta PA2576$ . **(A)** Growth curves of the *P. aeruginosa* PAO1161  $\Delta PA2577$ ,  $\Delta PA2576$  and WT strains in LB or M9+citrate at 37°C (*leu*<sup>+</sup> strains). **(B)** Selected pictures of swimming (left panel) and swarming (right panel) assays performed for PAO1161  $\Delta PA2577$ ,  $\Delta PA2576$  and WT strains. **(C)** Biofilm production of PAO1161 WT and  $\Delta PA2577$  in static cultures in LB medium. OD<sub>600</sub> was measured and biofilm formation was assessed by crystal violet staining, followed by measurement of OD<sub>580</sub>. Data represent mean OD<sub>600</sub>, OD<sub>580</sub> and OD<sub>580</sub>/OD<sub>600</sub> ratio  $\pm$  SD from 5 biological replicates. **(D)** Growth curves of the PAO1161  $\Delta PA2577$ ,  $\Delta PA2576$  and WT strains in M9+citrate and glutamine at 37°C.

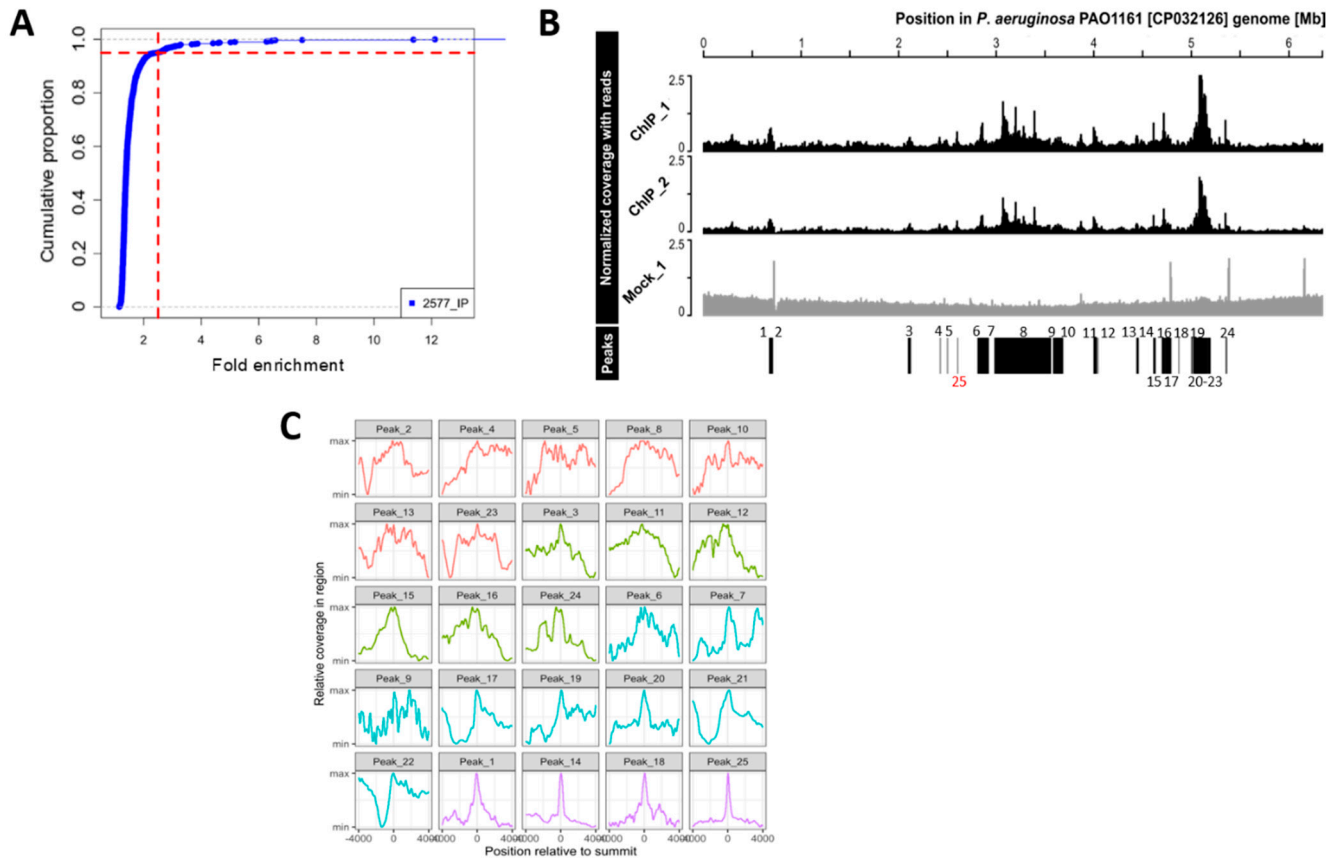

**Figure S2. Identification of PA2577 binding sites in *P. aeruginosa* genome.**

(A) Distribution of fold enrichment (FE) values for detected ChIP-seq peaks for cells expressing PA2577-FLAG. Cut-off value of 2.5 is shown as the red line. (B) Distribution of of PA2577 binding sites in PAO1161 genome. Data represent normalized coverage and location of identified peaks. (C) Analysis of the shape of identified ChIP-seq peaks. The normalized coverage signal was standardized to minimum and maximum value in the range +/- 4000 bp from predicted summit and the peaks were grouped by k-means clustering into 4 clusters (indicated with different color of lines). The details of peaks are included in Table S2.

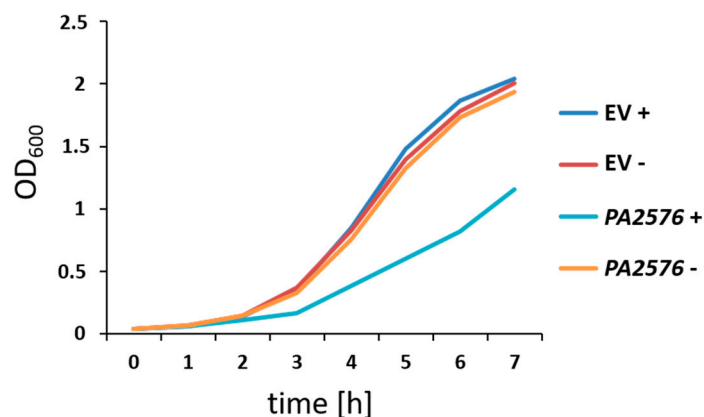

**Figure S3. Impact of PA2576 overexpression on the growth of the PAO1161 cells.**

Growth curves of *P. aeruginosa* PAO1161 strains carrying pMEB201 (*lacI<sup>Q</sup>-tacp-PA2576*; PA2576 overproducer) and pAMB9.37 (*lacI<sup>Q</sup>-tacp*; EV control) grown in LB under selection with the addition of 0.5 mM (+) or absence (-) of IPTG.

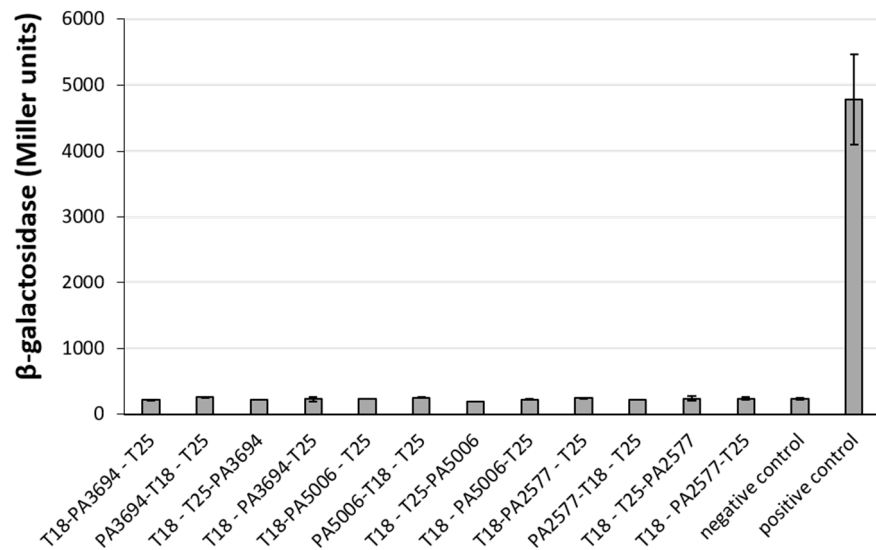

**Figure S4. Control experiments for BACTH analysis.** β-galactosidase measurements of *E. coli* BTH101 *cya*<sup>-</sup> double transformants carrying empty BACTH vectors and appropriate proteins fused with *cyaA* subunit being the controls for the interactions identified by BACTH system. Negative control (empty pKT25 and pUT18C) and positive control (pKT25-zip and pUT18C-zip) (BACTH System Kit; Euromedex) are included.

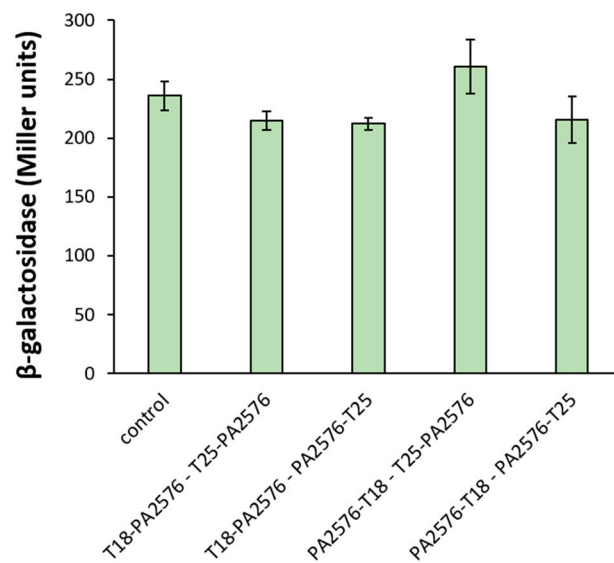

**Figure S5. BACTH system analysis of PA2576 self-interactions.** Data represent the mean ± SD values of β-galactosidase activity measured in cell extracts from three independent cultures of *E. coli* BTH101 *cya*<sup>-</sup> double transformants producing indicated fusion proteins.
