# Supplementary material for: The Lrp/AsnC-Type Regulator PA2577 Controls the EamA-like Transporter Gene PA2576 in Pseudomonas aeruginosa
Source: Int J Mol Sci. 2021 Dec 12;22(24):13340. doi: 10.3390/ijms222413340 (PMC8707732; doi:10.3390/ijms222413340)
Supplement: Supplementary file 1 [file ijms-22-13340-s001.zip › Table S1.xlsx]

## Sheet: Arkusz1
Table S1: Results of RNA-seq analysis. List of 171 genes with altered expression identified by comparison of PA2577+ vs EV transcriptomes [fold change (FC) ≤ -1.5 or ≥ 1.5, FDR ≤ 0.01]. Bolded PseudoCap categories were selected as an information about the gene presented in Fig. 3A. Genes identified only in the PAO1161 strain but not in PAO1 are described as “not annotated”. In the first column is…													PAO1161			PAO1
PA2577 ChIP-seq peak nr	PAO1161 ID	PAO1 ID	Fold Change	P-value	Q-value	Log CPM	Gene	Start	Stop	Strand	Product (in PAO1161)	PseudoCap category	Gene in operon?	Genes in operon	First_gene	Gene in operon?	Genes in operon	First_gene
	D3C65_00390	PA0069	1.50903	2.61406e-08	1.51921e-06	4.11398		81116	82174	+	PA0069 family radical SAM protein	HUU	FALSE			FALSE
	D3C65_01410	PA0266	1.56892	0.000717674	0.0107636	9.07332		301217	302497	+	5-aminovalerate aminotransferase DavT	AABM; CCC; CIM	FALSE			FALSE
	D3C65_01550	PA0293	1.50899	5.54351e-09	3.6487e-07	6.16576	aguB	329992	330870	-	N-carbamoylputrescine amidase	AABM; PE	FALSE			TRUE	PA0292 , PA0293	PA0293
	D3C65_01840	PA0347	1.52894	0.000698236	0.0105664	2.08846		389732	390883	-	glycerophosphodiester phosphodiesterase	FAPM	FALSE			FALSE
	D3C65_02585	PA0489	1.71992	9.81423e-07	3.96911e-05	2.48084		549654	550379	-	ComF family protein	PE	FALSE			FALSE
peak 1	D3C65_03190	PA0605	3.29851	0.00390366	0.0398294	5.04842		667107	668354	+	ABC transporter permease	MP; TSM	FALSE			TRUE	PA0605 , PA0606	PA0605
peak 1	D3C65_03215	PA0610	2.66022	1.89726e-33	2.46779e-31	5.8901		672776	673090	-	transcription regulatory protein PrtN	TR	FALSE			FALSE
peak 1	D3C65_03225	PA0612	4.58942	6.4084e-70	1.16697e-67	5.05617		674418	674618	+	repressor PtrB	TR	FALSE			TRUE	PA0612 , PA0613	PA0612
peak 1	D3C65_03230	PA0613	5.52879	1.9342e-86	5.28326e-84	5.15182		674666	675025	+	hypothetical protein	HUU	FALSE			TRUE	PA0612 , PA0613	PA0612
peak 1	D3C65_03235	PA0614	6.49481	5.5224e-102	2.74262e-99	3.64884		675389	675838	+	holin	HUU	TRUE	D3C65_03235, D3C65_03240, D3C65_03245	D3C65_03235	TRUE	PA0614 , PA0615 , PA0616	PA0614
peak 1	D3C65_03240	PA0615	3.98484	1.9694e-65	3.26024e-63	5.08572		675860	676375	+	hypothetical protein	HUU	TRUE	D3C65_03235, D3C65_03240, D3C65_03245	D3C65_03235	TRUE	PA0614 , PA0615 , PA0616	PA0614
peak 1	D3C65_03245	PA0616	6.37965	1.02075e-93	3.9831e-91	4.97346		676372	676929	+	phage baseplate assembly protein V	RPTP	TRUE	D3C65_03235, D3C65_03240, D3C65_03245	D3C65_03235	TRUE	PA0614 , PA0615 , PA0616	PA0614
peak 1	D3C65_03250	PA0617	6.1359	1.04524e-83	2.71911e-81	4.36898		677082	677408	+	bacteriophage protein	RPTP	TRUE	D3C65_03250, D3C65_03255, D3C65_03260, D3C65_03265, D3C65_03270	D3C65_03250	TRUE	PA0617 , PA0618 , PA0619 , PA0620 , PA0621	PA0617
peak 1	D3C65_03255	PA0618	5.8176	3.91718e-78	8.55982e-76	5.38607		677405	678292	+	bacteriophage protein	RPTP	TRUE	D3C65_03250, D3C65_03255, D3C65_03260, D3C65_03265, D3C65_03270	D3C65_03250	TRUE	PA0617 , PA0618 , PA0619 , PA0620 , PA0621	PA0617
peak 1	D3C65_03260	PA0619	7.15786	1.37739e-90	4.42628e-88	5.30441		678285	678818	+	phage tail protein I	RPTP	TRUE	D3C65_03250, D3C65_03255, D3C65_03260, D3C65_03265, D3C65_03270	D3C65_03250	TRUE	PA0617 , PA0618 , PA0619 , PA0620 , PA0621	PA0617
peak 1	D3C65_03265	PA0620	5.07852	4.90226e-70	9.23484e-68	7.16376		678820	680895	+	bacteriophage protein	RPTP	TRUE	D3C65_03250, D3C65_03255, D3C65_03260, D3C65_03265, D3C65_03270	D3C65_03250	TRUE	PA0617 , PA0618 , PA0619 , PA0620 , PA0621	PA0617
peak 1	D3C65_03270	PA0621	5.23586	6.63431e-92	2.41622e-89	4.93431		680892	681350	+	phage tail protein	RPTP	TRUE	D3C65_03250, D3C65_03255, D3C65_03260, D3C65_03265, D3C65_03270	D3C65_03250	TRUE	PA0617 , PA0618 , PA0619 , PA0620 , PA0621	PA0617
peak 1	D3C65_03275	PA0622	7.24152	3.40218e-109	2.32326e-106	7.69792		681393	682553	+	phage tail sheath family protein	RPTP	TRUE	D3C65_03275, D3C65_03280, D3C65_03285	D3C65_03275	TRUE	PA0622 , PA0623 , PA0624	PA0622
peak 1	D3C65_03280	PA0623	5.8804	2.99496e-78	6.81728e-76	6.03664		682566	683069	+	phage major tail tube protein	RPTP	TRUE	D3C65_03275, D3C65_03280, D3C65_03285	D3C65_03275	TRUE	PA0622 , PA0623 , PA0624	PA0622
peak 1	D3C65_03285	PA0624	5.86847	3.77786e-98	1.71987e-95	5.47587		683084	683428	+	phage tail assembly protein	RPTP	TRUE	D3C65_03275, D3C65_03280, D3C65_03285	D3C65_03275	TRUE	PA0622 , PA0623 , PA0624	PA0622
peak 1	D3C65_03290	PA0625	5.32049	1.06329e-68	1.81524e-66	6.40882		683598	685835	+	phage tail tape measure protein	RPTP	TRUE	D3C65_03290, D3C65_03295, D3C65_03300	D3C65_03290	TRUE	PA0625 , PA0626 , PA0627	PA0625
peak 1	D3C65_03295	PA0626	4.86241	6.00283e-94	2.52257e-91	4.54629		685845	686717	+	phage tail protein	RPTP	TRUE	D3C65_03290, D3C65_03295, D3C65_03300	D3C65_03290	TRUE	PA0625 , PA0626 , PA0627	PA0625
peak 1	D3C65_03305	PA0628	4.97998	2.48245e-79	5.89636e-77	4.51269		686956	687945	+	phage late control D family protein	RPTP	TRUE	D3C65_03305, D3C65_03310, D3C65_03315, D3C65_03320, D3C65_03325	D3C65_03305	TRUE	PA0628 , PA0629 , PA0630 , PA0631 , PA0632	PA0628
peak 1	D3C65_03310	PA0629	6.04559	1.415e-70	2.76076e-68	3.59377		687978	688607	+	glycoside hydrolase family 19 protein	RPTP	TRUE	D3C65_03305, D3C65_03310, D3C65_03315, D3C65_03320, D3C65_03325	D3C65_03305	TRUE	PA0628 , PA0629 , PA0630 , PA0631 , PA0632	PA0628
peak 1	D3C65_03330	PA0633	7.34049	1.22054e-127	2.2226e-124	7.2051		689536	690030	+	phage tail protein	RPTP	TRUE	D3C65_03330, D3C65_03335, D3C65_03340	D3C65_03330	TRUE	PA0633 , PA0634 , PA0635	PA0633
peak 1	D3C65_03335	PA0634	7.15128	2.2777e-144	6.22153e-141	5.92687		690042	690389	+	hypothetical protein	RPTP	TRUE	D3C65_03330, D3C65_03335, D3C65_03340	D3C65_03330	TRUE	PA0633 , PA0634 , PA0635	PA0633
peak 1	D3C65_03340	PA0635	8.33303	2.81085e-106	1.70619e-103	5.46744		690419	690673	+	hypothetical protein	RPTP	TRUE	D3C65_03330, D3C65_03335, D3C65_03340	D3C65_03330	TRUE	PA0633 , PA0634 , PA0635	PA0633
peak 1	D3C65_03345	PA0636	6.67328	2.90562e-104	1.58734e-101	6.35944		690720	692555	+	phage tail tape measure protein	RPTP	TRUE	D3C65_03345, D3C65_03350, D3C65_03355, D3C65_03360	D3C65_03345	TRUE	PA0636 , PA0637 , PA0638 , PA0639 , PA0640	PA0636
peak 1	D3C65_03350	PA0637	7.3057	1.2283e-114	9.58601e-112	3.80171		692548	692889	+	phage tail protein	RPTP	TRUE	D3C65_03345, D3C65_03350, D3C65_03355, D3C65_03360	D3C65_03345	TRUE	PA0636 , PA0637 , PA0638 , PA0639 , PA0640	PA0636
peak 1	D3C65_03355	PA0638	6.92913	1.87107e-119	1.70361e-116	4.60245		692897	693592	+	phage minor tail protein L	RPTP	TRUE	D3C65_03345, D3C65_03350, D3C65_03355, D3C65_03360	D3C65_03345	TRUE	PA0636 , PA0637 , PA0638 , PA0639 , PA0640	PA0636
peak 1	D3C65_03360	PA0639	7.64035	1.05217e-119	1.1496e-116	4.51059		693595	694365	+	phage tail protein	RPTP	TRUE	D3C65_03345, D3C65_03350, D3C65_03355, D3C65_03360	D3C65_03345	TRUE	PA0636 , PA0637 , PA0638 , PA0639 , PA0640	PA0636
peak 1	D3C65_03365	PA0640	6.05497	9.12758e-90	2.62442e-87	4.34588		694420	695022	+	tail assembly protein	RPTP	FALSE			TRUE	PA0636 , PA0637 , PA0638 , PA0639 , PA0640	PA0636
peak 1	D3C65_03370	PA0641	7.25118	3.19943e-121	4.36962e-118	6.82818		695081	698695	+	DUF1983 domain-containing protein	RPTP	FALSE			FALSE
	D3C65_03375	PA0642	4.3898	2.53377e-33	3.21906e-31	3.92597		698931	699719	+	hypothetical protein	RPTP	TRUE	D3C65_03375, D3C65_03380, D3C65_03385, D3C65_03390	D3C65_03375	FALSE
peak 2	D3C65_03380	PA0643	4.28764	9.72524e-61	1.51797e-58	5.5229		699743	700834	+	hypothetical protein	RPTP	TRUE	D3C65_03375, D3C65_03380, D3C65_03385, D3C65_03390	D3C65_03375	TRUE	PA0643 , PA0644 , PA0645	PA0643
peak 2	D3C65_03385	PA0644	3.26611	5.75859e-40	8.06645e-38	3.67115		700834	701169	+	hypothetical protein	RPTP	TRUE	D3C65_03375, D3C65_03380, D3C65_03385, D3C65_03390	D3C65_03375	TRUE	PA0643 , PA0644 , PA0645	PA0643
peak 2	D3C65_03390	PA0645	3.12787	1.88699e-30	2.34287e-28	3.39394		701150	701380	+	hypothetical protein	RPTP	TRUE	D3C65_03375, D3C65_03380, D3C65_03385, D3C65_03390	D3C65_03375	TRUE	PA0643 , PA0644 , PA0645	PA0643
peak 2	D3C65_03395	PA0646	4.56284	7.1308e-82	1.77071e-79	5.81363		701476	702528	+	phage tail protein	RPTP	TRUE	D3C65_03395, D3C65_03400, D3C65_03405	D3C65_03395	TRUE	PA0646 , PA0647 , PA0648	PA0646
peak 2	D3C65_03400	PA0647	3.54479	1.40446e-47	2.0191e-45	3.78981		702528	702830	+	hypothetical protein	RPTP	TRUE	D3C65_03395, D3C65_03400, D3C65_03405	D3C65_03395	TRUE	PA0646 , PA0647 , PA0648	PA0646
peak 2	D3C65_03405	PA0648	2.72117	7.54956e-29	9.16517e-27	4.1153		702827	703057	+	hypothetical protein	RPTP	TRUE	D3C65_03395, D3C65_03400, D3C65_03405	D3C65_03395	TRUE	PA0646 , PA0647 , PA0648	PA0646
	D3C65_03490	PA0665	0.564344	0.000175109	0.00350411	6.71724	erpA	717230	717580	+	iron-sulfur cluster insertion protein ErpA	HUU	FALSE			FALSE
	D3C65_03515	not annotated	0.597386	0.000719147	0.0107636	3.23504		723695	723771	+	tRNA-Ile	not annotated	FALSE
	D3C65_03520	not annotated	0.505288	3.2718e-11	3.02946e-09	6.01534		723800	723875	+	tRNA-Ala	not annotated	FALSE
	D3C65_03550	PA4277.3	0.535305	1.46013e-10	1.24636e-08	8.05478		729956	730040	+	tRNA-Tyr	NCRNA	FALSE			FALSE
	D3C65_03555	PA4277.2	0.628854	3.35672e-06	0.000119076	5.80067		730067	730140	+	tRNA-Gly	NCRNA	FALSE			FALSE
	D3C65_03570	PA4276.1	0.581009	6.36971e-12	6.32685e-10	7.83476		731569	731644	+	tRNA-Trp	NCRNA	FALSE			FALSE
	D3C65_04070	PA4179	1.74896	8.31992e-07	3.44331e-05	5.27442		839590	840885	-	outer membrane porin, OprD family	MP; TSM	FALSE			FALSE
	D3C65_05570	PA3888	1.53803	4.16837e-05	0.00108437	3.13213		1160564	1161286	-	ABC transporter permease	MP; TSM	TRUE	D3C65_05555, D3C65_05560, D3C65_05565, D3C65_05570	D3C65_05570	TRUE	PA3888 , PA3889 , PA3890 , PA3891	PA3888
	D3C65_05690	PA3866	4.95299	1.35418e-90	4.42628e-88	7.57157		1186454	1188133	+	pyocin protein	AP; SF	TRUE	D3C65_05690, D3C65_05695	D3C65_05690	FALSE
	D3C65_06105	PA3788	1.57143	0.00119238	0.0160839	2.77059		1269625	1270020	-	DUF4345 domain-containing protein	MP	FALSE			FALSE
	D3C65_06225	PA3766	1.50428	0.000101359	0.00230718	5.65968		1292651	1293907	+	aromatic amino acid transporter	TSM	FALSE			FALSE
	D3C65_06270	PA3758	1.59666	5.16899e-08	2.79586e-06	4.19856	nagA	1306571	1307662	-	N-acetylglucosamine-6-phosphate deacetylase	CIM	TRUE	D3C65_06255, D3C65_06260, D3C65_06265, D3C65_06270, D3C65_06275	D3C65_06275	TRUE	PA3757 , PA3758 , PA3759 , PA3760 , PA3761	PA3757
	D3C65_07460	PA3530	0.507965	5.68369e-08	3.04412e-06	3.38457		1565756	1565977	-	(2Fe-2S)-binding protein	HUU	FALSE			FALSE
	D3C65_07920	PA3441	0.5839	0.0026096	0.0297005	1.24492		1667898	1668113	+	molybdopterin-binding protein	TSM	FALSE			TRUE	PA3441 , PA3442 , PA3443 , PA3444 , PA3445	PA3445
	D3C65_08065	PA3414	2.06137	8.68035e-19	1.03089e-16	4.96654		1694939	1695523	-	hypothetical protein	HUU	TRUE	D3C65_08065, D3C65_08070	D3C65_08070	TRUE	PA3413 , PA3414	PA3413
	D3C65_08120	not annotated	1.6422	2.50355e-05	0.000702582	2.73351		1706566	1706853	-	DUF3509 domain-containing protein	HUU	FALSE
	D3C65_08160	PA3396	0.470627	0.00251758	0.0289737	1.79699		1713347	1713883	-	accessory protein NosL	EM	TRUE	D3C65_08160, D3C65_08165, D3C65_08170, D3C65_08175, D3C65_08180	D3C65_08180	TRUE	PA3391 , PA3392 , PA3393 , PA3394 , PA3395 , PA3396	PA3391
	D3C65_09040	PA3232	1.528	0.000130871	0.00281476	3.35431		1896212	1896838	+	3'-5' exonuclease	PE	TRUE	D3C65_09035, D3C65_09040	D3C65_09035	TRUE	PA3232 , PA3233 , PA3234 , PA3235	PA3235
	D3C65_09455	PA3154	0.599789	5.5576e-11	4.97724e-09	7.35062		1976707	1978023	+	O-antigen polymerase	CWLC; MP	TRUE	D3C65_09440, D3C65_09445, D3C65_09450, D3C65_09455, D3C65_09460, D3C65_09465, D3C65_09470	D3C65_09440	TRUE	PA3151 , PA3152 , PA3153 , PA3154 , PA3155 , PA3156 , PA3157 , PA3158	PA3158
	D3C65_09465	PA3152	0.642998	2.04039e-06	7.48096e-05	6.40426	hisH	1979252	1979860	+	imidazole glycerol phosphate synthase subunit HisH	AABM	TRUE	D3C65_09440, D3C65_09445, D3C65_09450, D3C65_09455, D3C65_09460, D3C65_09465, D3C65_09470	D3C65_09440	TRUE	PA3151 , PA3152 , PA3153 , PA3154 , PA3155 , PA3156 , PA3157 , PA3158	PA3158
	D3C65_09470	PA3151	0.633048	1.29745e-09	9.32627e-08	7.91914		1979860	1980615	+	imidazole glycerol phosphate synthase cyclase subunit	AABM	TRUE	D3C65_09440, D3C65_09445, D3C65_09450, D3C65_09455, D3C65_09460, D3C65_09465, D3C65_09470	D3C65_09440	TRUE	PA3151 , PA3152 , PA3153 , PA3154 , PA3155 , PA3156 , PA3157 , PA3158	PA3158
	D3C65_09555	PA3133.4	0.583908	1.17047e-06	4.52823e-05	5.94731		2000617	2000692	+	tRNA-Ala	NCRNA	FALSE			FALSE
	D3C65_09560	PA3133.3	0.591719	2.74648e-10	2.20647e-08	6.72863		2000741	2000816	+	tRNA-Glu	NCRNA	FALSE			FALSE
	D3C65_09565	PA3133.2	0.617618	4.89793e-08	2.67574e-06	5.64001		2000910	2000985	+	tRNA-Ala	NCRNA	FALSE			FALSE
	D3C65_09570	PA3133.1	0.465447	9.21267e-05	0.00212358	3.43839		2001032	2001107	+	tRNA-Glu	NCRNA	FALSE			FALSE
	D3C65_09610	PA3126	1.70951	0.000167012	0.00340443	7.02835		2006665	2007114	+	heat-shock protein IbpA	CHSP	FALSE			FALSE
	D3C65_09775	PA3094.2	0.60766	2.62084e-05	0.000730491	7.10187		2040106	2040182	+	tRNA-Asp	NCRNA	FALSE			FALSE
peak 3	D3C65_10085	PA3037	2.76284	1.08809e-11	1.06147e-09	2.37176		2115304	2116170	-	MBL fold metallo-hydrolase	HUU	TRUE	D3C65_10085, D3C65_10090, D3C65_10095	D3C65_10095	TRUE	PA3035 , PA3036 , PA3037	PA3035
peak 3	D3C65_10090	PA3036	3.4523	7.73433e-14	8.62299e-12	2.31073		2116170	2117102	-	flavin-nucleotide-binding protein	HUU	TRUE	D3C65_10085, D3C65_10090, D3C65_10095	D3C65_10095	TRUE	PA3035 , PA3036 , PA3037	PA3035
peak 3	D3C65_10095	PA3035	3.19805	4.13274e-18	4.80365e-16	3.14761		2117119	2117715	-	glutathione S-transferase	PE	TRUE	D3C65_10085, D3C65_10090, D3C65_10095	D3C65_10095	TRUE	PA3035 , PA3036 , PA3037	PA3035
	D3C65_10245	PA3007	1.56587	1.81542e-11	1.70994e-09	7.52798	lexA	2147302	2147916	-	transcriptional repressor LexA	AP; TPTMD	TRUE	D3C65_10240, D3C65_10245	D3C65_10245	TRUE	PA3007 , PA3008	PA3007
	D3C65_11220	PA2819.2	0.569781	7.75397e-10	5.64799e-08	6.12269		2341984	2342059	+	tRNA-Gly	NCRNA	FALSE			FALSE
	D3C65_11225	PA2819.1	0.493041	1.11988e-07	5.71764e-06	5.06177		2342144	2342219	+	tRNA-Gly	NCRNA	FALSE			FALSE
	D3C65_11755	not annotated	0.643457	9.40062e-08	4.84487e-06	4.64758		2427782	2428006	-	type I toxin-antitoxin system SymE family toxin	not annotated	FALSE
peak 5	D3C65_12075	PA2668	0.61979	8.07921e-07	3.39513e-05	3.96672		2498850	2499146	+	hypothetical protein	HUU	FALSE			FALSE
peak 5	D3C65_12095	PA2664	0.241232	0.00334766	0.0360006	7.07962		2502048	2503229	+	flavohemoprotein	EM	FALSE			FALSE
peak 5	D3C65_12105	PA2662	0.394203	0.0018184	0.0226286	5.51692		2503528	2504721	+	short-chain dehydrogenase	MP	TRUE	D3C65_12100, D3C65_12105	D3C65_12100	TRUE	PA2662 , PA2663	PA2663
	D3C65_12410	PA2603.1	0.292259	1.54255e-11	1.47841e-09	1.56888		2568148	2568237	+	tRNA-Ser	NCRNA	FALSE			FALSE
	D3C65_12520	PA2583.1	0.315479	1.55998e-08	9.57546e-07	3.14504		2592523	2592598	+	tRNA-Gly	NCRNA	FALSE			FALSE
peak 25	D3C65_12545	PA2581.1	0.520989	8.19553e-07	3.41772e-05	4.62832		2597144	2597217	+	tRNA-Cys	NCRNA	FALSE			FALSE
peak 25	D3C65_12565	PA2578	4.47459	2.1865e-52	3.31801e-50	4.20732		2600887	2601447	-	N-acetyltransferase	PE	TRUE	D3C65_12565, D3C65_12570	D3C65_12570	TRUE	PA2577 , PA2578	PA2577
peak 25	D3C65_12570	PA2577	715.443	0	0	12.0567		2601462	2601899	-	Lrp/AsnC family transcriptional regulator	TR	TRUE	D3C65_12565, D3C65_12570	D3C65_12570	TRUE	PA2577 , PA2578	PA2577
peak 25	D3C65_12575	PA2576	0.257428	5.65944e-34	7.54086e-32	4.32474		2602032	2602931	+	DMT family transporter	MP	FALSE			FALSE
peak 8	D3C65_14220	PA2260	1.66037	7.02701e-06	0.000236966	2.98333		3025980	3026762	-	AP endonuclease	CCC	TRUE	D3C65_14215, D3C65_14220	D3C65_14220	TRUE	PA2259 , PA2260 , PA2261 , PA2262 , PA2263	PA2259
peak 8	D3C65_14265	PA2252	1.50537	1.76228e-06	6.59408e-05	8.47474		3034968	3036413	-	sodium:alanine symporter family protein	TSM	FALSE			TRUE	PA2252 , PA2253	PA2252
peak 8	D3C65_14460	PA2215	0.616697	0.00235163	0.0275096	1.52709		3079436	3080611	-	L-rhamnonate dehydratase	HUU	TRUE	D3C65_14455, D3C65_14460, D3C65_14465	D3C65_14465	TRUE	PA2214 , PA2215 , PA2216	PA2214
peak 8	D3C65_14625	PA2182	0.632021	0.00479599	0.0467032	1.65333		3111057	3111326	+	hypothetical protein	HUU	FALSE			FALSE
peak 8	D3C65_15455	PA2036	0.590756	0.00130157	0.0171751	1.4809		3288314	3288835	-	methyltransferase domain-containing protein	HUU	FALSE			FALSE
peak 8	D3C65_15695	PA1989	1.58689	0.000331661	0.00590183	2.94436		3340659	3341804	-	coenzyme PQQ synthesis protein E	BCPGC	TRUE	D3C65_15690, D3C65_15695, D3C65_15700, D3C65_15705, D3C65_15710	D3C65_15710	TRUE	PA1985 , PA1986 , PA1987 , PA1988 , PA1989 , PA1990	PA1985
peak 8	D3C65_15710	PA1986	1.58588	4.66044e-05	0.00118972	2.90397		3342813	3343727	-	pyrroloquinoline quinone biosynthesis protein B	BCPGC	TRUE	D3C65_15690, D3C65_15695, D3C65_15700, D3C65_15705, D3C65_15710	D3C65_15710	TRUE	PA1985 , PA1986 , PA1987 , PA1988 , PA1989 , PA1990	PA1985
	D3C65_16715	PA1796.1	0.609601	2.88111e-10	2.28109e-08	8.26736		3568040	3568116	-	tRNA-Arg	NCRNA	FALSE			FALSE
	D3C65_16760	PA1788	0.61666	1.2643e-08	8.03127e-07	4.83776		3576943	3577410	-	DUF1289 domain-containing protein	HUU	FALSE			FALSE
peak 10	D3C65_17105	PA1724	0.61111	2.28538e-05	0.000650261	2.97961		3649921	3650547	-	type III export protein PscK	PSE	TRUE	D3C65_17100, D3C65_17105, D3C65_17110, D3C65_17115, D3C65_17120, D3C65_17125, D3C65_17130, D3C65_17135, D3C65_17140, D3C65_17145, D3C65_17150, D3C65_17155	D3C65_17155	TRUE	PA1714 , PA1715 , PA1716 , PA1717 , PA1718 , PA1719 , PA1720 , PA1721 , PA1722 , PA1723 , PA1724 , PA1725	PA1714
peak 10	D3C65_17125	PA1720	0.523171	1.07966e-06	4.27405e-05	3.04405		3652065	3652412	-	type III export protein PscG	CHSP; PSE	TRUE	D3C65_17100, D3C65_17105, D3C65_17110, D3C65_17115, D3C65_17120, D3C65_17125, D3C65_17130, D3C65_17135, D3C65_17140, D3C65_17145, D3C65_17150, D3C65_17155	D3C65_17155	TRUE	PA1714 , PA1715 , PA1716 , PA1717 , PA1718 , PA1719 , PA1720 , PA1721 , PA1722 , PA1723 , PA1724 , PA1725	PA1714
peak 10	D3C65_17130	PA1719	0.544898	2.38421e-07	1.1326e-05	2.81968		3652415	3652672	-	EscF/YscF/HrpA family type III secretion system needle major subunit	PSE	TRUE	D3C65_17100, D3C65_17105, D3C65_17110, D3C65_17115, D3C65_17120, D3C65_17125, D3C65_17130, D3C65_17135, D3C65_17140, D3C65_17145, D3C65_17150, D3C65_17155	D3C65_17155	TRUE	PA1714 , PA1715 , PA1716 , PA1717 , PA1718 , PA1719 , PA1720 , PA1721 , PA1722 , PA1723 , PA1724 , PA1725	PA1714
peak 10	D3C65_17155	PA1714	0.62253	4.08872e-06	0.000141371	5.72745		3656399	3657229	-	ExsD	HUU	TRUE	D3C65_17100, D3C65_17105, D3C65_17110, D3C65_17115, D3C65_17120, D3C65_17125, D3C65_17130, D3C65_17135, D3C65_17140, D3C65_17145, D3C65_17150, D3C65_17155	D3C65_17155	TRUE	PA1714 , PA1715 , PA1716 , PA1717 , PA1718 , PA1719 , PA1720 , PA1721 , PA1722 , PA1723 , PA1724 , PA1725	PA1714
peak 10	D3C65_17165	PA1712	0.614061	9.23962e-07	3.76687e-05	3.75947		3658461	3658874	-	exoenzyme S synthesis protein B	PSE; TPTMD	TRUE	D3C65_17165, D3C65_17170, D3C65_17175	D3C65_17175	TRUE	PA1710 , PA1711 , PA1712	PA1710
peak 10	D3C65_17170	PA1711	0.450547	1.20338e-08	7.73418e-07	2.84031		3658883	3659128	-	ExsE	PSE; TR	TRUE	D3C65_17165, D3C65_17170, D3C65_17175	D3C65_17175	TRUE	PA1710 , PA1711 , PA1712	PA1710
peak 10	D3C65_17175	PA1710	0.552327	3.54957e-09	2.36479e-07	5.12365		3659137	3659574	-	exoenzyme S synthesis protein C	PSE; TPTMD	TRUE	D3C65_17165, D3C65_17170, D3C65_17175	D3C65_17175	TRUE	PA1710 , PA1711 , PA1712	PA1710
peak 10	D3C65_17180	PA1709	0.621119	0.000130418	0.00281476	4.39823		3659700	3660587	-	translocator outer membrane protein PopD	PSE	TRUE	D3C65_17180, D3C65_17185, D3C65_17190, D3C65_17195, D3C65_17200, D3C65_17205, D3C65_17210, D3C65_17215, D3C65_17220, D3C65_17225, D3C65_17230, D3C65_17235	D3C65_17235	TRUE	PA1698 , PA1699 , PA1700 , PA1701 , PA1702 , PA1703 , PA1704 , PA1705 , PA1706 , PA1707 , PA1708 , PA1709	PA1698
peak 10	D3C65_17190	PA1707	0.603022	8.11882e-06	0.000267478	2.86399		3661752	3662255	-	CesD/SycD/LcrH family type III secretion system chaperone	PSE; SF	TRUE	D3C65_17180, D3C65_17185, D3C65_17190, D3C65_17195, D3C65_17200, D3C65_17205, D3C65_17210, D3C65_17215, D3C65_17220, D3C65_17225, D3C65_17230, D3C65_17235	D3C65_17235	TRUE	PA1698 , PA1699 , PA1700 , PA1701 , PA1702 , PA1703 , PA1704 , PA1705 , PA1706 , PA1707 , PA1708 , PA1709	PA1698
peak 10	D3C65_17195	PA1706	0.645125	3.58658e-05	0.000951141	3.2915		3662264	3663148	-	type III secretion protein PcrV	PSE	TRUE	D3C65_17180, D3C65_17185, D3C65_17190, D3C65_17195, D3C65_17200, D3C65_17205, D3C65_17210, D3C65_17215, D3C65_17220, D3C65_17225, D3C65_17230, D3C65_17235	D3C65_17235	TRUE	PA1698 , PA1699 , PA1700 , PA1701 , PA1702 , PA1703 , PA1704 , PA1705 , PA1706 , PA1707 , PA1708 , PA1709	PA1698
peak 10	D3C65_17225	PA1700	0.598162	0.00125086	0.0166669	1.37092	sycN	3666726	3667097	-	type III secretion chaperone SycN	PSE; SF	TRUE	D3C65_17180, D3C65_17185, D3C65_17190, D3C65_17195, D3C65_17200, D3C65_17205, D3C65_17210, D3C65_17215, D3C65_17220, D3C65_17225, D3C65_17230, D3C65_17235	D3C65_17235	TRUE	PA1698 , PA1699 , PA1700 , PA1701 , PA1702 , PA1703 , PA1704 , PA1705 , PA1706 , PA1707 , PA1708 , PA1709	PA1698
peak 10	D3C65_17235	PA1698	0.626207	0.000606669	0.00944226	3.57724		3667343	3668209	-	YopN family type III secretion system gatekeeper subunit	MP; PSE	TRUE	D3C65_17180, D3C65_17185, D3C65_17190, D3C65_17195, D3C65_17200, D3C65_17205, D3C65_17210, D3C65_17215, D3C65_17220, D3C65_17225, D3C65_17230, D3C65_17235	D3C65_17235	TRUE	PA1698 , PA1699 , PA1700 , PA1701 , PA1702 , PA1703 , PA1704 , PA1705 , PA1706 , PA1707 , PA1708 , PA1709	PA1698
peak 10	D3C65_17245	PA1696	0.522553	0.00033551	0.00593168	1.19643		3669719	3670195	+	translocation protein in type III secretion	PSE	TRUE	D3C65_17240, D3C65_17245, D3C65_17250, D3C65_17255, D3C65_17260, D3C65_17265, D3C65_17270, D3C65_17275	D3C65_17240	TRUE	PA1690 , PA1691 , PA1692 , PA1693 , PA1694 , PA1695 , PA1696 , PA1697	PA1697
peak 10	D3C65_17255	PA1694	0.564867	0.000591539	0.00925954	2.72112		3671289	3672218	+	YscQ/HrcQ family type III secretion apparatus protein	PSE	TRUE	D3C65_17240, D3C65_17245, D3C65_17250, D3C65_17255, D3C65_17260, D3C65_17265, D3C65_17270, D3C65_17275	D3C65_17240	TRUE	PA1690 , PA1691 , PA1692 , PA1693 , PA1694 , PA1695 , PA1696 , PA1697	PA1697
	D3C65_17380	PA1670	0.55691	4.20807e-08	2.34579e-06	3.11195		3692108	3692836	-	serine/threonine-protein phosphatase	PSE; TPTMD	TRUE	D3C65_17375, D3C65_17380, D3C65_17385, D3C65_17390, D3C65_17395, D3C65_17400, D3C65_17405, D3C65_17410	D3C65_17410	TRUE	PA1664 , PA1665 , PA1666 , PA1667 , PA1668 , PA1669 , PA1670 , PA1671	PA1664
	D3C65_18275	PA1502	1.76357	1.60927e-07	7.90958e-06	2.37898	gcl	3882760	3884535	+	glyoxylate carboligase	CIM	FALSE			FALSE
	D3C65_18615	PA1435	1.53004	0.000173964	0.00350411	3.56567		3951467	3952624	-	multidrug efflux RND transporter periplasmic adaptor subunit MexM	TSM	TRUE	D3C65_18610, D3C65_18615	D3C65_18615	TRUE	PA1435 , PA1436 , PA1437 , PA1438	PA1435
peak 11	D3C65_18840	PA1391	0.605742	2.88685e-06	0.000104443	3.21007		4001402	4003177	-	glycosyltransferase family 1 protein	PE	TRUE	D3C65_18835, D3C65_18840, D3C65_18845	D3C65_18845	TRUE	PA1390 , PA1391	PA1390
peak 12	D3C65_18950	PA1369	0.6354	4.60677e-07	2.06285e-05	6.09009		4031562	4032314	-	hypothetical protein	HUU	TRUE	D3C65_18945, D3C65_18950	D3C65_18950	FALSE
	D3C65_19210	PA1320	0.596106	0.000369069	0.0063856	1.89667		4083413	4083748	-	cytochrome bo(3) ubiquinol oxidase subunit 4	EM	TRUE	D3C65_19205, D3C65_19210, D3C65_19215, D3C65_19220, D3C65_19225	D3C65_19225	TRUE	PA1317 , PA1318 , PA1319 , PA1320 , PA1321	PA1317
	D3C65_20080	not annotated	0.513792	0.00385833	0.0396204	1.15385		4267712	4267945	-	hypothetical protein	not annotated	FALSE
	D3C65_20110	PA1150	2.90997	1.94037e-37	2.65006e-35	7.13568		4269775	4271844	-	pyocin-S2	AP; SF	TRUE	D3C65_20105, D3C65_20110	D3C65_20110	FALSE
	D3C65_20175	PA1137	1.6529	0.00364267	0.0381224	3.98115		4286240	4287226	+	oxidoreductase	PE	FALSE			FALSE
	D3C65_20980	PA0985	6.51506	4.71469e-90	1.43091e-87	5.51035		4447902	4449095	+	pyocin S5	MP; SF	FALSE			FALSE
	D3C65_20985	PA0984	0.645861	0.00010476	0.0023668	3.9927		4449120	4449446	-	colicin immunity protein	MP; SF	FALSE			FALSE
	D3C65_21150	PA0954	0.569866	3.30875e-09	2.23157e-07	2.99519		4474709	4474984	-	acylphosphatase	PE	TRUE	D3C65_21150, D3C65_21155	D3C65_21155	TRUE	PA0953 , PA0954	PA0953
	D3C65_21390	PA0911	4.99337	8.19773e-78	1.72247e-75	3.64677		4520258	4520710	-	hypothetical protein	HUU	FALSE			FALSE
	D3C65_21395	PA0910	4.78182	6.52375e-69	1.14965e-66	4.30414		4520763	4521266	-	hypothetical protein	HUU	FALSE			FALSE
	D3C65_21400	PA0909	6.25439	1.2408e-63	1.99367e-61	2.56905		4521358	4521633	-	phage holin family protein	MP; RPTP	TRUE	D3C65_21400, D3C65_21405	D3C65_21405	TRUE	PA0908 , PA0909	PA0908
	D3C65_21405	PA0908	4.64663	4.01437e-48	5.92717e-46	3.27457		4521626	4522000	-	hypothetical protein	ARS	TRUE	D3C65_21400, D3C65_21405	D3C65_21405	TRUE	PA0908 , PA0909	PA0908
	D3C65_21420	PA0905.3	0.595438	1.67028e-05	0.000493228	4.94406		4523677	4523753	-	tRNA-Arg	NCRNA	FALSE			FALSE
peak 15	D3C65_21940	PA0808	2.67306	5.80638e-12	5.87412e-10	2.1507		4629302	4629775	-	polyketide cyclase	HUU	FALSE			FALSE
peak 15	D3C65_21945	PA0807	5.55482	4.57698e-76	9.26076e-74	5.34425		4629844	4630611	-	N-acetylmuramoyl-L-alanine amidase	ARS	FALSE			FALSE
	D3C65_22090	PA0779	1.66728	0.00442832	0.0439055	8.86276	lon	4667218	4669617	+	endopeptidase La	AP; PE	FALSE			FALSE
	D3C65_22190	PA0760	0.632843	3.4641e-08	1.97129e-06	4.75588		4686539	4686793	-	succinate dehydrogenase assembly factor 2 family protein	HUU	TRUE	D3C65_22185, D3C65_22190	D3C65_22190	FALSE
peak 16	D3C65_22355	PA0729.1	0.366575	1.68351e-07	8.13893e-06	1.80545		4717617	4717690	+	tRNA-Gly	NCRNA	FALSE			FALSE
peak 17	D3C65_22445	PA0715	0.646318	2.21316e-08	1.31418e-06	7.22196		4728486	4729442	-	RNA-directed DNA polymerase	RPTP	TRUE	D3C65_22440, D3C65_22445	D3C65_22445	FALSE
peak 17	D3C65_22670	PA0671	2.55755	7.91001e-16	9.00258e-14	2.15294	imuA	4782621	4783226	+	translesion DNA synthesis-associated protein ImuA	HUU	TRUE	D3C65_22670, D3C65_22675, D3C65_22680	D3C65_22670	TRUE	PA0669 , PA0670 , PA0671	PA0671
peak 17	D3C65_22675	PA0670	1.96442	1.66051e-10	1.39559e-08	2.694		4783234	4784649	+	DNA polymerase Y family protein	HUU	TRUE	D3C65_22670, D3C65_22675, D3C65_22680	D3C65_22670	TRUE	PA0669 , PA0670 , PA0671	PA0671
peak 17	D3C65_22680	PA0669	1.76531	2.58055e-10	2.10411e-08	3.5357		4784625	4787720	+	error-prone DNA polymerase	DRRMR; PE	TRUE	D3C65_22670, D3C65_22675, D3C65_22680	D3C65_22670	TRUE	PA0669 , PA0670 , PA0671	PA0671
peak 17	D3C65_22695	not annotated	0.515062	4.93701e-10	3.79871e-08	6.08737		4791452	4791527	-	tRNA-Ala	not annotated	FALSE
peak 17	D3C65_22700	not annotated	0.59758	0.000462678	0.00763629	3.10757		4791556	4791632	-	tRNA-Ile	not annotated	FALSE
	D3C65_22760	PA4290	1.55164	1.79196e-06	6.65951e-05	6.67315		4812098	4813714	-	methyl-accepting chemotaxis protein	AP; CHE	FALSE			FALSE
	D3C65_23070	PA4350	1.66228	0.00117845	0.0159748	1.60041		4878290	4879045	+	GNAT family N-acetyltransferase	HUU	TRUE	D3C65_23070, D3C65_23075	D3C65_23070	TRUE	PA4350 , PA4351	PA4350
	D3C65_23090	PA4354	1.66939	6.12882e-05	0.00151501	4.35641		4881553	4881855	+	transcriptional regulator	TR	FALSE			TRUE	PA4354 , PA4355 , PA4356	PA4354
	D3C65_23105	PA4357	0.42075	2.85156e-09	1.97191e-07	2.72183		4884219	4884461	-	hypothetical protein	HUU	TRUE	D3C65_23105, D3C65_23110, D3C65_23115	D3C65_23115	TRUE	PA4357 , PA4358 , PA4359	PA4359
	D3C65_23110	PA4358	0.593072	6.7126e-11	5.82078e-09	7.07636	feoB	4884461	4886761	-	Fe(2+) transporter permease subunit FeoB	MP; TSM	TRUE	D3C65_23105, D3C65_23110, D3C65_23115	D3C65_23115	TRUE	PA4357 , PA4358 , PA4359	PA4359
	D3C65_23115	PA4359	0.569548	7.27529e-06	0.000243834	4.5666		4886779	4887006	-	ferrous iron transporter A	HUU	TRUE	D3C65_23105, D3C65_23110, D3C65_23115	D3C65_23115	TRUE	PA4357 , PA4358 , PA4359	PA4359
	D3C65_23260	PA4386	1.53441	0.00291362	0.0322863	10.0911		4916676	4916969	-	molecular chaperone GroES	CHSP	FALSE			TRUE	PA4385 , PA4386	PA4386
	D3C65_23265	PA4387	1.56956	7.64651e-05	0.00183214	5.45281	fxsA	4917164	4917631	-	membrane protein FxsA	MP	FALSE			TRUE	PA4387 , PA4388	PA4388
	D3C65_23970	PA4524.1	0.416849	4.62538e-10	3.60978e-08	6.34596		5068435	5068510	-	tRNA-Thr	NCRNA	FALSE			FALSE
	D3C65_23975	PA4525	0.567548	9.12534e-14	9.97035e-12	12.1092		5068584	5069033	-	prepilin-type cleavage/methylation domain-containing protein	MA	FALSE			FALSE
peak 20	D3C65_24110	not annotated	0.63343	0.00228462	0.0270149	2.07507		5094253	5094780	+	hypothetical protein	not annotated	TRUE	D3C65_24105, D3C65_24110, D3C65_24115	D3C65_24105
peak 22	D3C65_24515	not annotated	0.53816	9.88101e-07	3.96911e-05	4.95797		5170023	5170334	-	DUF2845 domain-containing protein	not annotated	FALSE
peak 22	D3C65_24585	not annotated	0.592051	9.30778e-06	0.000300878	3.86747		5180601	5181224	-	hypothetical protein	not annotated	TRUE	D3C65_24585, D3C65_24590	D3C65_24590
peak 23	D3C65_24595	not annotated	0.562207	0.000371259	0.0063856	1.31768		5181922	5182353	+	TIGR03757 family integrating conjugative element protein	not annotated	TRUE	D3C65_24595, D3C65_24600, D3C65_24605, D3C65_24610, D3C65_24615	D3C65_24595
peak 23	D3C65_24640	not annotated	0.619839	0.000298363	0.0053617	3.31857		5188683	5188922	-	hypothetical protein	not annotated	TRUE	D3C65_24635, D3C65_24640	D3C65_24640
	D3C65_24660	not annotated	0.622604	1.03072e-05	0.000327375	5.86025		5194273	5194348	-	tRNA-Lys	not annotated	FALSE
	D3C65_24665	PA4541.2	0.601484	4.96047e-07	2.20318e-05	5.12392		5194359	5194435	-	tRNA-Pro	NCRNA	FALSE			FALSE
	D3C65_24965	PA4597	2.67559	0.00427682	0.0428702	4.27916		5256980	5258419	-	outer membrane protein OprJ	ARS; MP; TSM	TRUE	D3C65_24965, D3C65_24970, D3C65_24975	D3C65_24975	TRUE	PA4597 , PA4598 , PA4599	PA4599
	D3C65_25580	PA4690.3	0.494257	2.6179e-12	2.69842e-10	6.11533		5386890	5386965	-	tRNA-Ala	NCRNA	FALSE			FALSE
	D3C65_25585	PA4690.4	0.5267	0.00057324	0.00900691	3.1656		5386994	5387070	-	tRNA-Ile	NCRNA	FALSE			FALSE
	D3C65_25900	PA4748	0.632529	2.3206e-10	1.92082e-08	9.62355		5452156	5452911	-	triose-phosphate isomerase	CIM; EM	TRUE	D3C65_25895, D3C65_25900	D3C65_25900	TRUE	PA4747 , PA4748 , PA4749 , PA4750 , PA4751	PA4751
	D3C65_25980	PA4763	1.67214	3.38718e-13	3.62827e-11	6.90102	recN	5469339	5471015	+	DNA repair protein RecN	DRRMR	FALSE			FALSE
	D3C65_25995	PA4766	0.581643	1.93667e-06	7.14865e-05	3.66182		5472185	5472490	-	RnfH family protein	HUU	TRUE	D3C65_25995, D3C65_26000	D3C65_26000	TRUE	PA4766 , PA4767	PA4767
	D3C65_26015	PA4770	2.01862	2.64313e-06	9.62629e-05	8.84623		5474797	5476485	+	L-lactate permease	TSM	FALSE			FALSE
	D3C65_26020	PA4771	1.71726	1.08756e-06	4.27434e-05	8.1502		5476640	5477785	+	alpha-hydroxy-acid oxidizing enzyme	EM	FALSE			TRUE	PA4771 , PA4772	PA4771
	D3C65_26025	PA4772	1.87579	1.4868e-09	1.05486e-07	8.99672		5477852	5480668	+	FAD-binding oxidoreductase	EM	FALSE			TRUE	PA4771 , PA4772	PA4771
	D3C65_26095	PA4785	1.58224	2.50784e-05	0.000702582	4.7637		5492001	5493278	-	acetyl-CoA C-acetyltransferase	PE	FALSE			FALSE
	D3C65_26590	PA4881	1.77154	0.00018483	0.00365843	2.78339		5597165	5597506	+	hypothetical protein	HUU	FALSE			FALSE
	D3C65_26880	PA4937.2	0.584944	2.1276e-05	0.000611741	6.45118		5661242	5661328	+	tRNA-Leu	NCRNA	FALSE			FALSE
	D3C65_27485	PA5053	1.73736	0.000136783	0.00291894	6.86571		5811990	5812523	+	HslU--HslV peptidase proteolytic subunit	CHSP	TRUE	D3C65_27485, D3C65_27490	D3C65_27485	TRUE	PA5053 , PA5054 , PA5055	PA5053
	D3C65_27490	PA5054	1.81471	0.000261703	0.00482406	8.44813		5812552	5813895	+	HslU--HslV peptidase ATPase subunit	CHSP	TRUE	D3C65_27485, D3C65_27490	D3C65_27485	TRUE	PA5053 , PA5054 , PA5055	PA5053
	D3C65_28000	PA5149.1	0.306912	7.63774e-10	5.63851e-08	2.55448		5917975	5918050	+	tRNA-Phe	NCRNA	FALSE			FALSE
	D3C65_28060	PA5160.1	0.195305	1.58354e-08	9.61212e-07	1.96186		5929385	5929460	+	tRNA-Thr	NCRNA	FALSE			FALSE
	D3C65_29155	PA5369.3	0.527833	2.26885e-08	1.33277e-06	6.11807		6162378	6162453	-	tRNA-Ala	NCRNA	FALSE			FALSE
	D3C65_29160	PA5369.4	0.538988	0.000230815	0.00434695	3.19094		6162482	6162558	-	tRNA-Ile	NCRNA	FALSE			FALSE
	D3C65_29570	PA5445	1.74244	2.12779e-12	2.23541e-10	8.65078		6253252	6254745	+	acetyl-CoA hydrolase/transferase family protein	PE	FALSE			FALSE
	D3C65_30005	PA5530	2.06989	5.66715e-10	4.24105e-08	6.53529		6342573	6343880	+	MFS transporter	MP; TSM	FALSE			FALSE
