# Supplementary material for: The Lrp/AsnC-Type Regulator PA2577 Controls the EamA-like Transporter Gene PA2576 in Pseudomonas aeruginosa
Source: Int J Mol Sci. 2021 Dec 12;22(24):13340. doi: 10.3390/ijms222413340 (PMC8707732; doi:10.3390/ijms222413340)
Supplement: Supplementary file 1 [file ijms-22-13340-s001.zip › Table S2.xlsx]

## Sheet: Sheet1
	Table S2: Results of ChIP-seq analysis. P. aeruginosa loci with PA2577 binding sites identified in ChIP-seq analysis [fold enrichment (FE) cut-off value = 2.5].
		PAO1161	PAO1
	consecutive number	from - to (D3C65_)	from - to	start	end	length	summit	summit annotation	p_value_log10	fold_enrichment	q_value_log10.
	1	03165 - 03370	PA0600 - PA0641	661312	698856	37545	689966	D3C65_03330 (PA0633)	286.2478	5.17204	284.42062
	2	03380 - 03430	PA0643 - PA0653	699715	707278	7564	702237	D3C65_03395 (PA0646)	61.12494	2.60709	59.94073
	3	09955 - 10120	PA3061 - PA3031	2090214	2121040	30827	2117790	intergenic between D3C65_10095 and D3C65_10100 (PA3034 and PA3035)	117.69569	3.67078	116.24666
	4	11725 - 11750	PA2735 - PA2730	2417106	2426376	9271	2420287	D3C65_11730 (PA2734)	58.09139	2.65694	56.92819
	5	12020 - 12090	PA2679 - PA2627	2488661	2500500	11840	2492049	D3C65_12030 (PA2677)	44.51097	2.58038	43.44209
	6	13390 - 13480	PA2424 - PA2406	2799662	2825767	26106	2809792	D3C65_13400 (PA2422)	41.75459	2.52724	40.70679
	7	13480 - 13770	PA2406 - PA2348	2825979	2920776	94798	2852700	D3C65_13510 (PA2399)	346.84546	6.44287	344.91092
	8	13990 - 16650	PA2305 - PA1805	2973935	3556344	582410	3073350	D3C65_14435 (PA2220)	783.93787	11.36453	781.20081
	9	16770 - 16815	PA1787 - PA1778	3577864	3592851	14988	3587446	D3C65_16800 (PA1781)	44.54944	2.74993	43.4803
	10	16840 - 17325	PA1773 - PA1681	3596652	3683545	86894	3633981	D3C65_17035 (PA1737)	103.64801	3.78641	102.25119
	11	18780 - 18935	PA1403 - PA1372	3989232	4026555	37324	4005991	D3C65_18855 (PA1388)	202.27885	4.58181	200.59483
	12	18950 - 18995	PA1369 - PA1361	4031961	4042874	10914	4036040	D3C65_18970 (PA1366)	65.96608	2.64661	64.74862
	13	20925 - 20975	PA0997 - PA0987	4434552	4447714	13163	4443822	D3C65_20960 (PA0990)	80.37398	3.04087	79.07418
	14	21015 - 21045	PA0980 - PA0975	4452756	4455996	3241	4453891	D3C65_21020 (PA0978)	360.8754	6.45923	358.91669
	15	21815 - 21950	PA0833 - PA0806	4607301	4632005	24705	4618663	D3C65_21880 (PA0820)	266.03232	4.63598	264.24002
	16	22205 - 22440	PA0757 - PA0716	4689615	4727320	37706	4724279	D3C65_22395 (PA0723)	462.78867	6.31994	460.63504
	17	22445 - 22705	PA0715 - NA	4728925	4793471	64547	4730112	intergenic between D3C65_22445 and D3C65_22450 (PA0714 and PA0715)	269.13626	5.01793	267.33838
	18	22990 - 23030	PA4334 - PA4342	4862801	4870198	7398	4864955	D3C65_23000 (PA4336)	61.28783	2.69169	60.10253
	19	23660 - 23720	PA4464 - PA4476	4994204	5005322	11119	4995830	D3C65_23670 (PA4466)	75.62695	2.96328	74.35125
	20	23755 - 24435	PA4483 - NA	5014104	5156239	142136	5089785	D3C65_24080 (NA)	1508.93848	12.11679	1504.00842
	21	24435 - 24505	NA - NA	5156962	5169278	12317	5158801	D3C65_24440 (NA)	627.69989	7.50221	625.23273
	22	24515 - 24585	NA - NA	5170080	5180615	10536	5170943	D3C65_24525 (NA)	203.63943	4.40703	201.95306
	23	24590 - 24655	NA - NA	5181261	5194600	13340	5184046	D3C65_24605 (NA)	158.03529	3.86994	156.45108
	24	25375 - 25455	PA4673 - NA	5348013	5358229	10217	5355272	D3C65_25410 (NA)	442.08279	6.26443	439.97113
	25	12550 - 12590	PA2581 - PA2573	2597526	2605423	7484	2601906	intergenic between D3C65_12570 and D3C65_12575 (PA2576 and PA2577)	461.71277	5.94205	459.20413
